# Supplementary material
Source: publisher site journal article supplement (https://www.spandidos-publications.com/8626/downloadSupplementary)

Figure S1. ADRB1/2 expression in RCC. (A) Cancer-specific survival based on ADRB1/2 expression in clear cell RCC. (B) ADRB1/2 expression in clear cell and papillary RCC. ADRB,  $\beta$ -adrenergic receptor; RCC, renal cell carcinoma. Scale bar, 200  $\mu$ m.

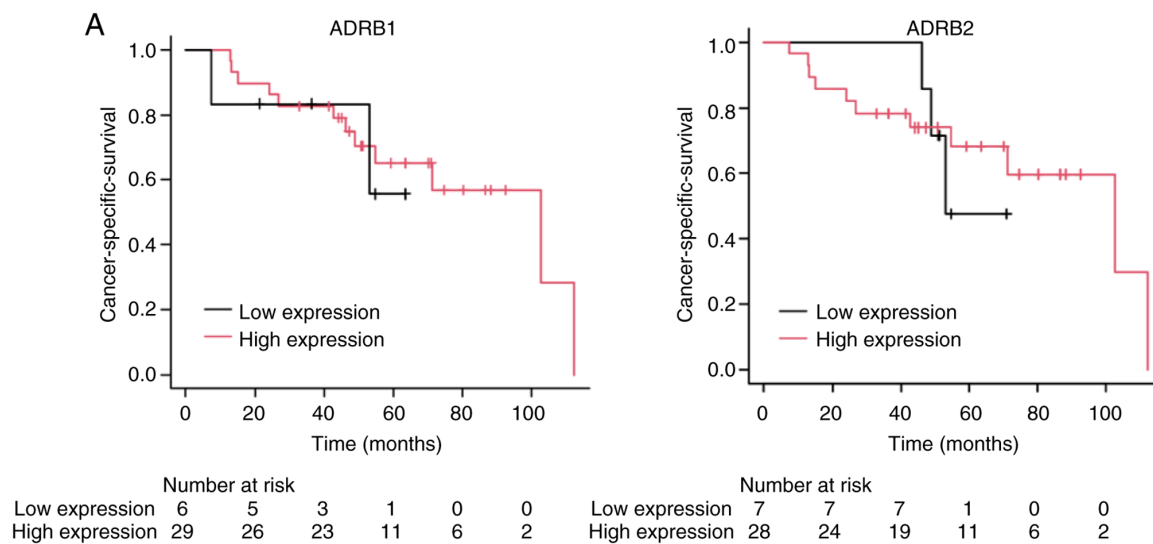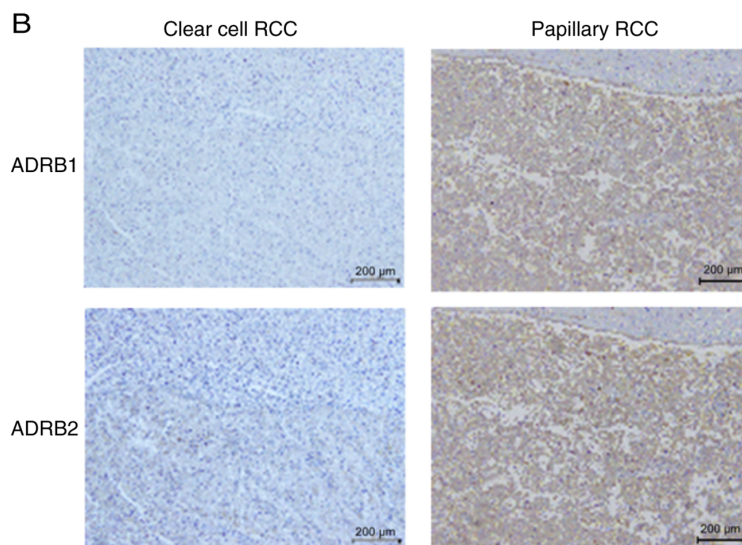

Figure S2. Full blot of ADRB1, ADRB2 and  $\alpha$ -tubulin. (A) ADRB1, (B) ADRB2 and (C)  $\alpha$ -tubulin. ADRB,  $\beta$ -adrenergic receptor.

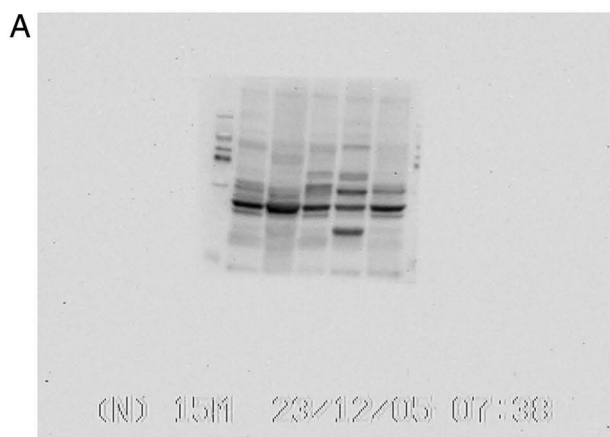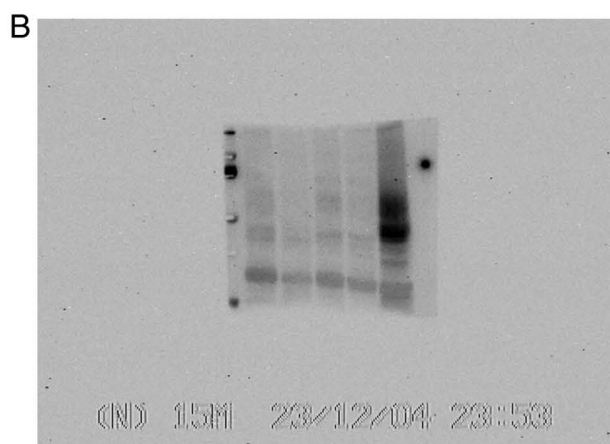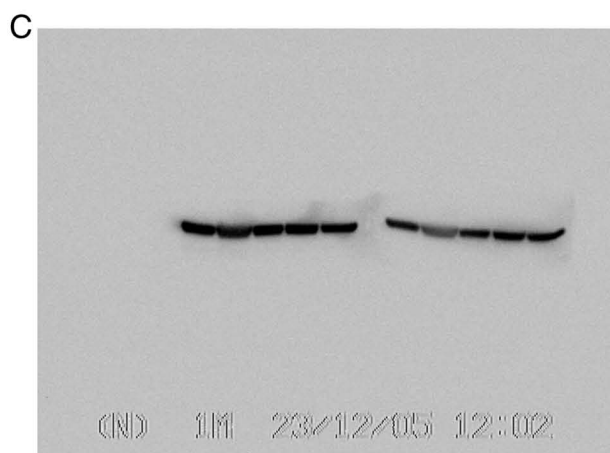

Figure S3. Full blot of si ADRB1 and siADRB2. (A) siADRB1 and (B) siADRB2. ADRB,  $\beta$ -adrenergic receptor; si, small interfering.

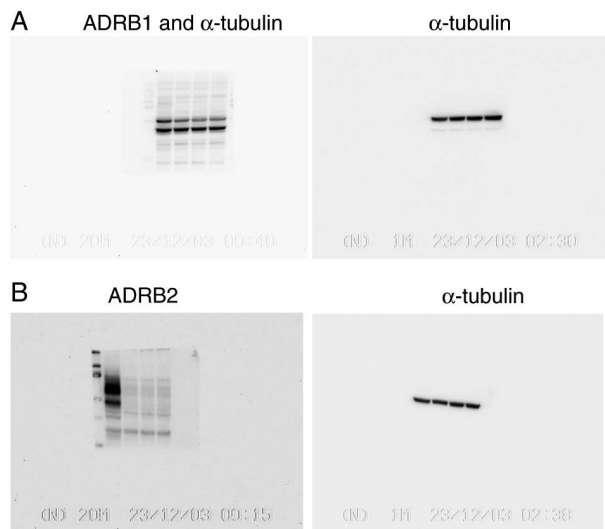

Figure S4. ADRB2 knockdown using shRNA. ADRB2 (A) mRNA and (B) protein levels in mock and shADRB2-transfected ACHN cells. sh, short hairpin; ADRB,  $\beta$ -adrenergic receptor. \*\*\*\* $P < 0.0001$ .

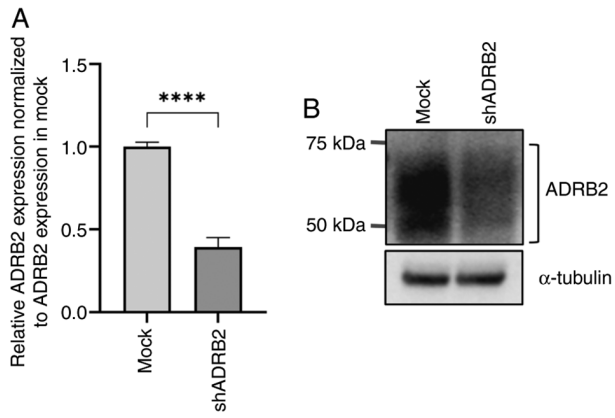

Figure S5. Full blot of DUSP1, p-p38, p38, p-JNK, JNK, p-ERK1/2, ERK1/2 and  $\alpha$ -tubulin. (A) DUSP1, (B) p-p38, (C) p38, (D) p-JNK, (E) JNK, (F) p-ERK1/2, (G) ERK1/2 and (H)  $\alpha$ -tubulin. DUSP1, dual-specific phosphatase 1; p-, phosphorylated.

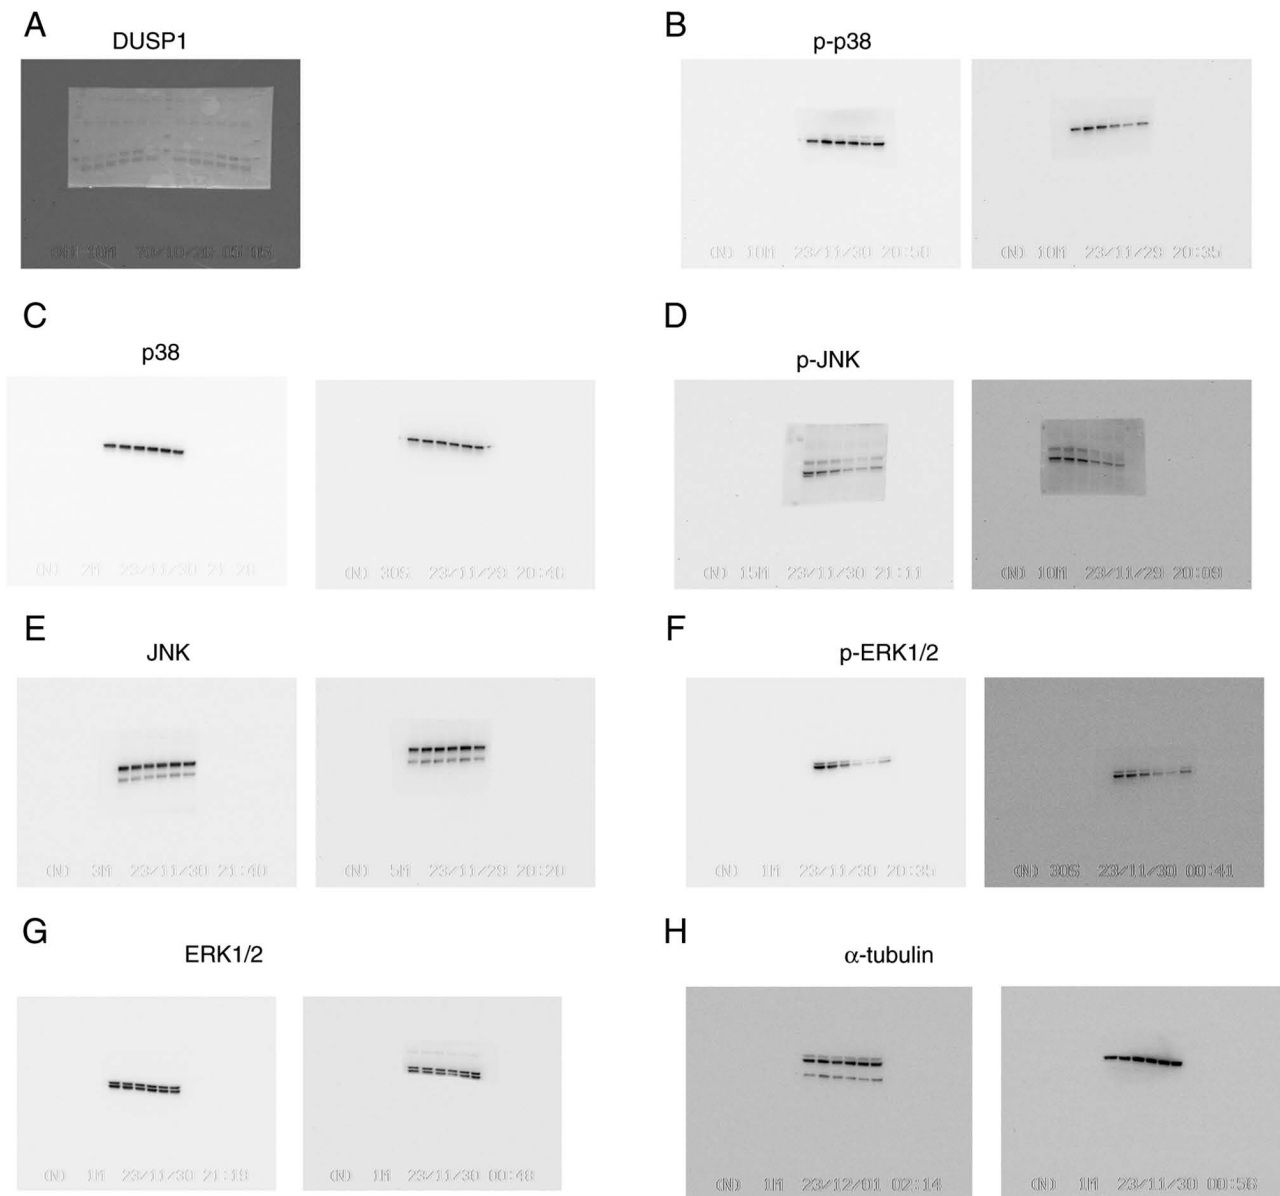

Supplement: Supplementary file 1 [file downloadSupplementary]
